# Supplementary material for: Enhanced OH− conductivity from 3D alkaline graphene oxide electrolytes for anion exchange membrane fuel cells
Source: Royal Society of Chemistry journal article supplement (doi:10.1039/d4ya00059e), 2024-01-01
Supplement: d4ya00059e1.pdf [file d4ya00059e1.pdf]

## Enhanced OH- Conductivity from 3D Alkaline Graphene Oxide Electrolytes for Anion Exchange Membrane Fuel Cell

Nonoka Goto,<sup>a||</sup> Mohammad Atiqur Rahman,<sup>a, b, c||</sup> Md. Saidul Islam,<sup>a, e</sup> Ryuta Tagawa,<sup>a</sup> Chiyu Nakano,<sup>d</sup> Muhammad Sohail Ahmed,<sup>e</sup> Yoshihiro Sekine,<sup>a, f</sup> Yuta Nishina,<sup>d</sup> Shintaro Ida,<sup>e</sup> and Shinya Hayami<sup>\*a, e, g</sup>

<sup>a</sup> Department of Chemistry, Graduate School of Science and Technology, Kumamoto University, 2-39-1 Kurokami, Chuo-ku, Kumamoto 860-8555, Japan.

<sup>b</sup> Department of Chemistry, Comilla University, Cumilla-3500, Bangladesh

<sup>c</sup> International Research Organization for Advanced Science and Technology, Kumamoto University, 2-39-1 Kurokami, Chuo-ku, Kumamoto 860-8555, Japan

<sup>d</sup> Research Core for Interdisciplinary Sciences, Okayama University Professor (Research), Graduate School of Natural Science and Technology, Okayama University

<sup>e</sup> Institute of Industrial Nanomaterials (IINa), Kumamoto University, 2-39-1 Kurokami, Chuo-ku, Kumamoto 860-8555, Japan.

<sup>f</sup> Priority Organization for Innovation and Excellence, Kumamoto University, 2-39-1 Kurokami, Chuo-ku, Kumamoto 860-8555, Japan.

<sup>g</sup> International Research Center for Agricultural and Environmental Biology (IRCAEB), 2-39-1 Kurokami, Chuo-ku, Kumamoto 860-8555, Japan.

|| Author contribute equally

\*Corresponding author

Email: [hayami@kumamoto-u.ac.jp](mailto:hayami@kumamoto-u.ac.jp)

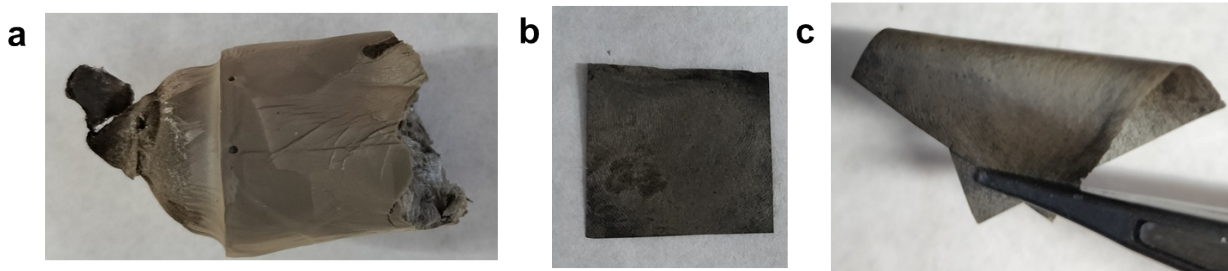

**Fig. S1.** Optical photograph of: (a) 3DGO11 sample, (b) 3DGO 11 film and (c) 3DGO11 film vented by tweezers

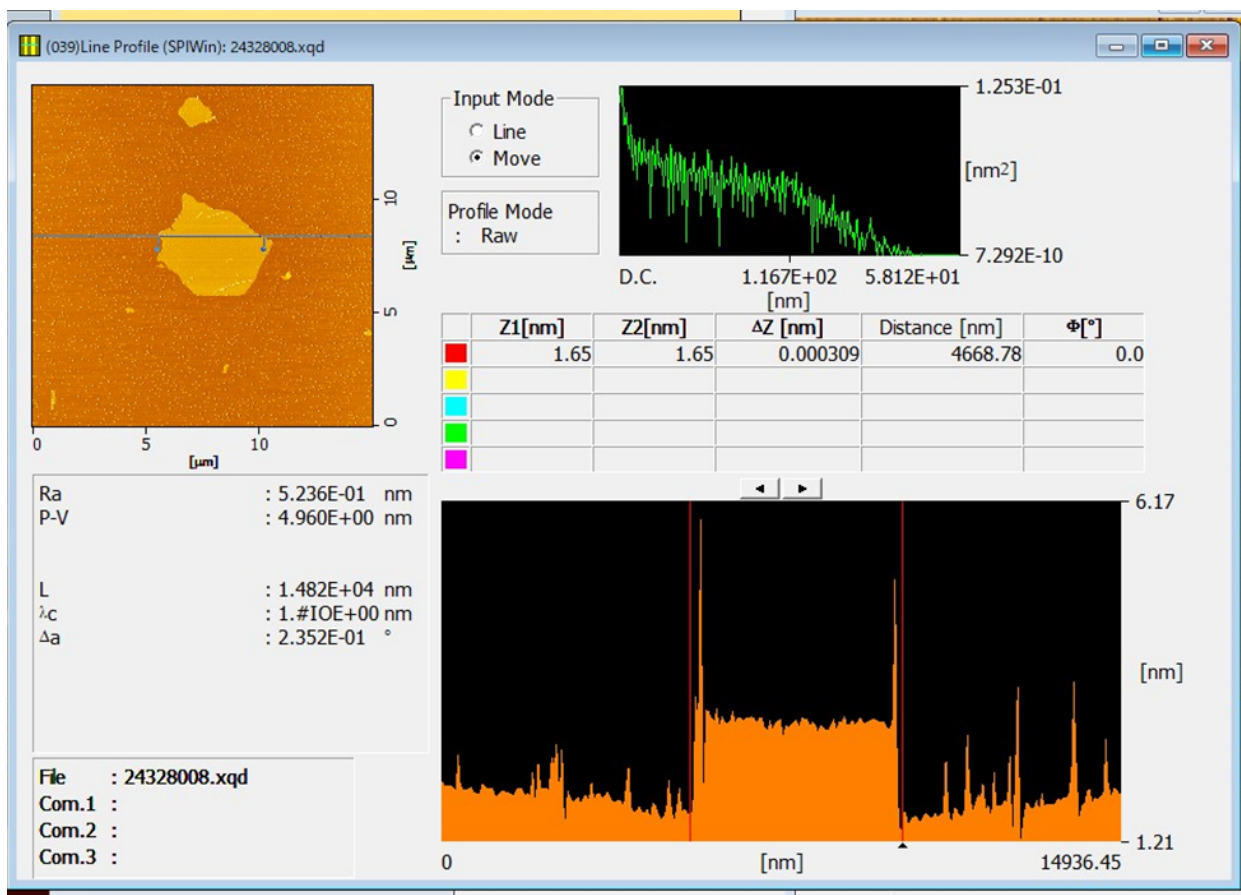

Fig. S2. AFM image of GO 11 sheet on mica surfac

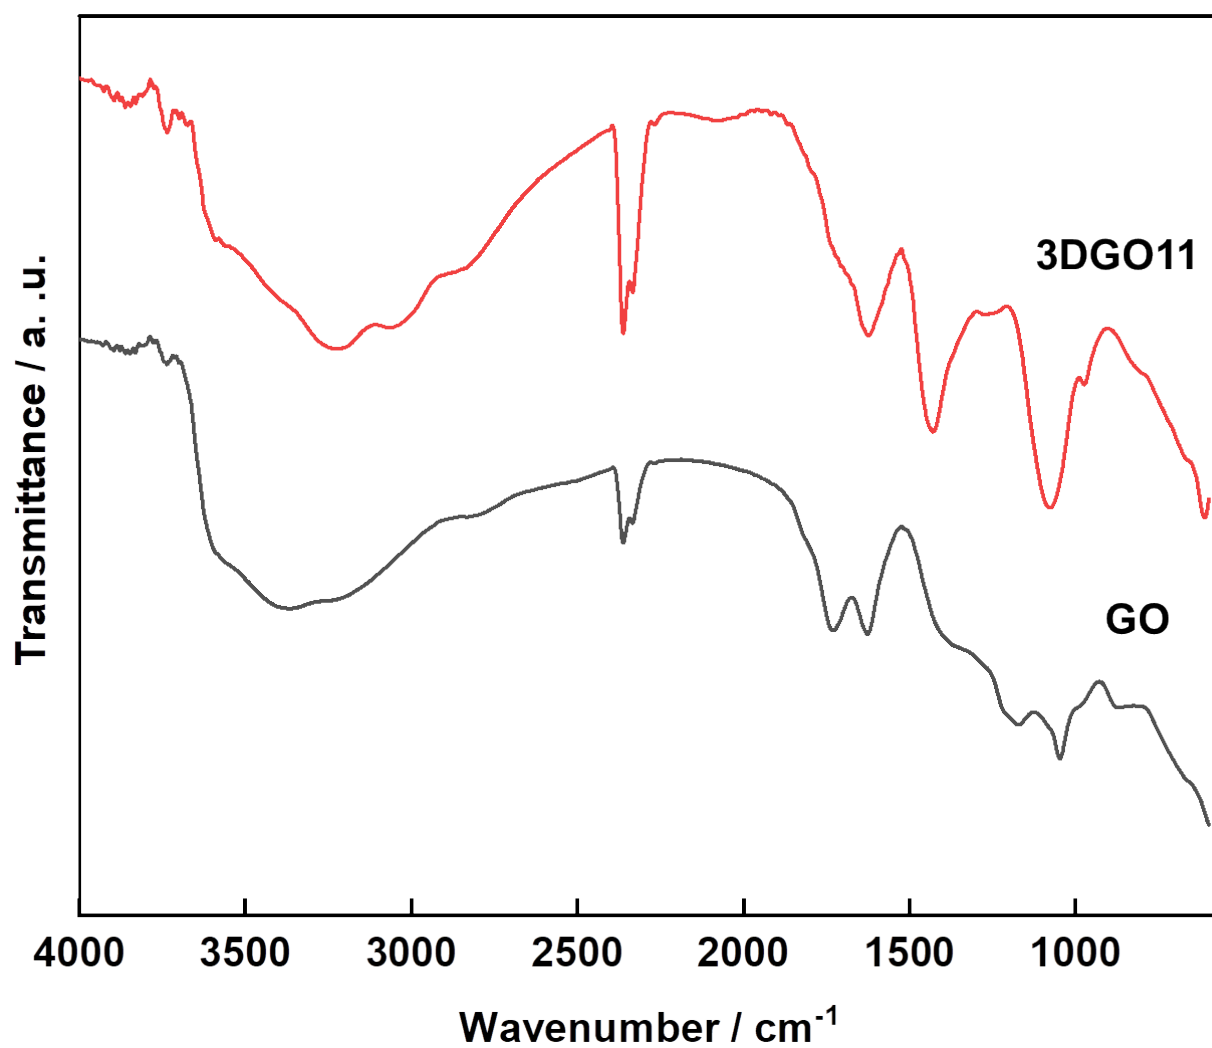

**Fig. S3.** FTIR spectra of C1s for (a) GO and (b) 3DGO11

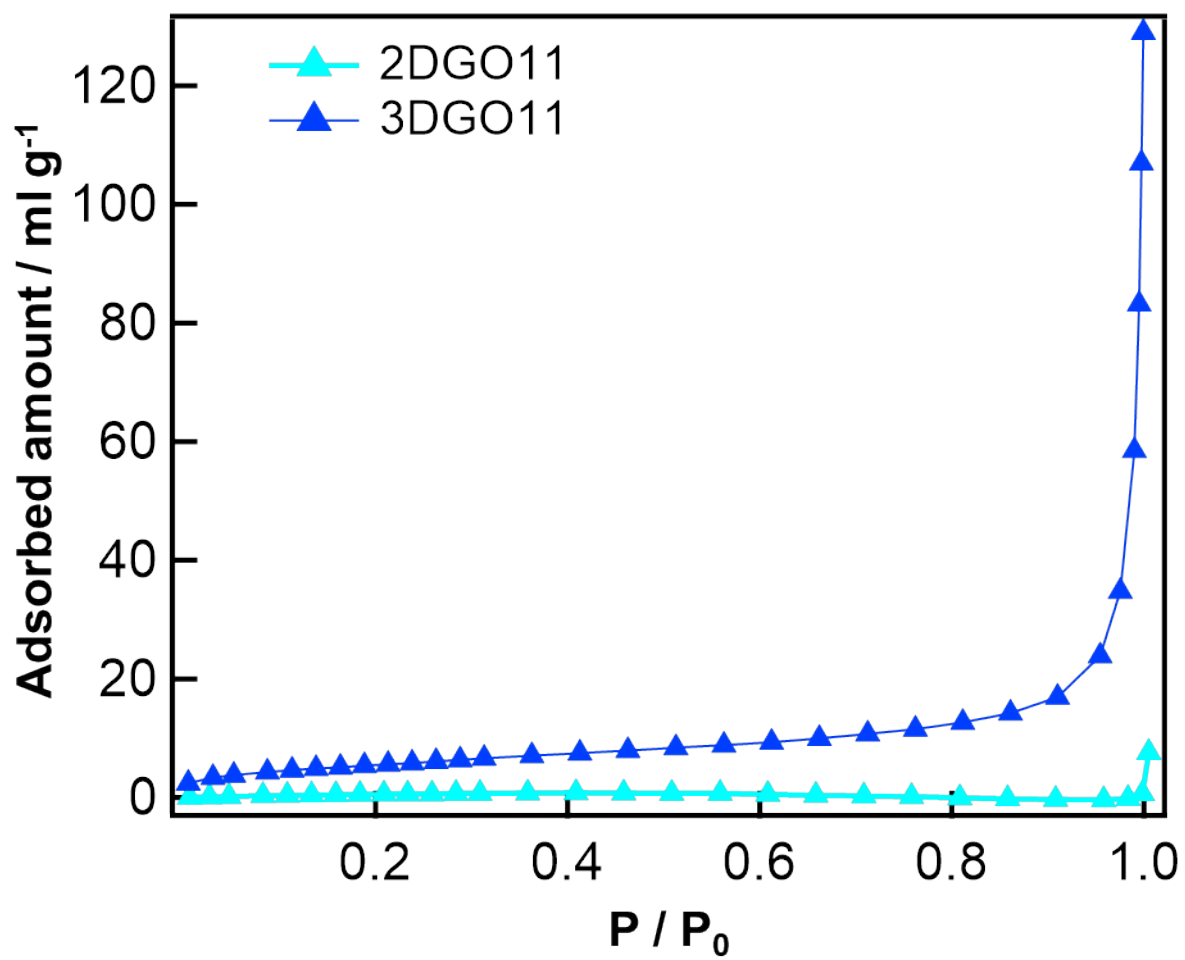

**Figure S4.** Surface analysis of 2DGO11 and 2DGO11

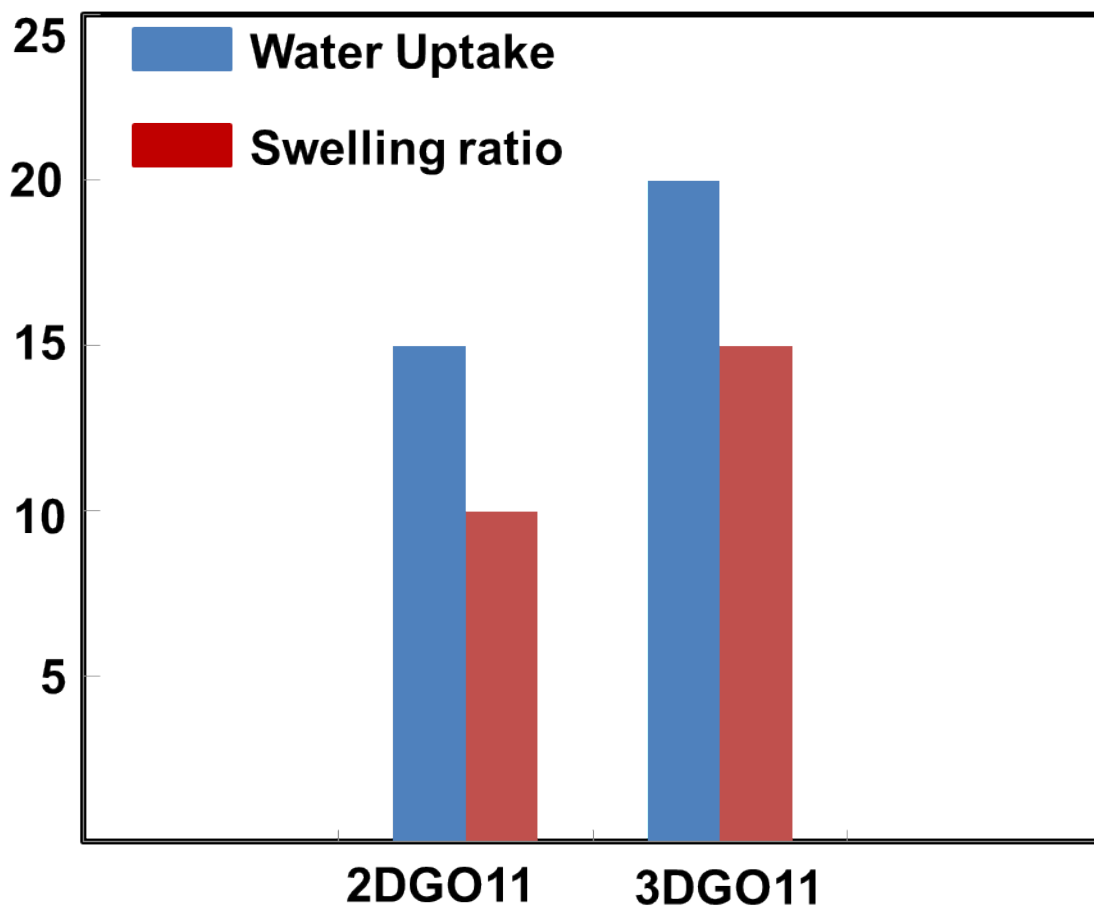

**Figure S5:** Water uptake and swelling ratio of 2DGO11 and 3DGO11
